# Supplementary material
Source: Springer Nature journal article supplement (https://www.springermedizin.de/resource/supplementary/12911_2013_818_MOESM5_ESM.pdf/9526704)

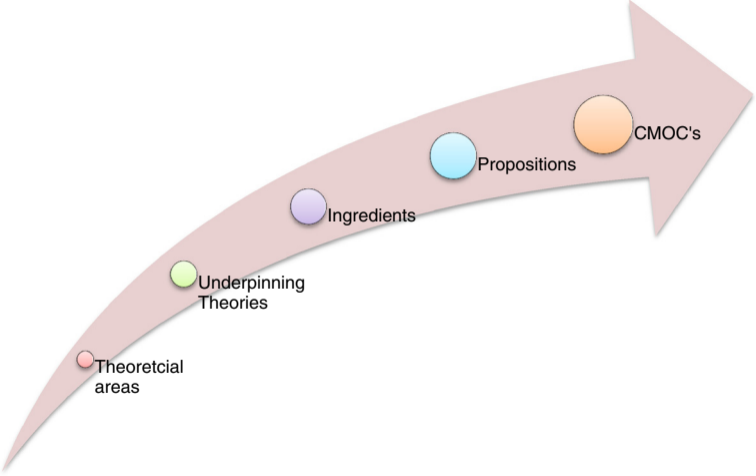

Theoretical areas

Underpinning Theories

Ingredients

Propositions

CMOC's

Supplement: MOESM5 [file 9526704]
